# Supplementary material for: First Report on Genome Editing via Ribonucleoprotein (RNP) in Castanea sativa Mill
Source: MDPI journal article supplement (doi:10.3390/ijms23105762), 2022-05-20
Supplement: s1 [file s1]

**S1 File:** solutions for protoplasts' isolation

**Cell-wall digestion enzyme solution**

MES: 2-[N-morpholino]-ethanesulfonic acid; CaCl<sub>2</sub>: calcium chloride, KCl: potassium chloride

|                         |       |
|-------------------------|-------|
| <b>Macerozyme R-10</b>  | 0,5%  |
| <b>Cellulase R-10</b>   | 1 %   |
| <b>MES</b>              | 20 mM |
| <b>Mannitol</b>         | 0,5 M |
| <b>KCl</b>              | 20 mM |
| <b>CaCl<sub>2</sub></b> | 10 mM |

**Washing solution**

MES: 2-[N-morpholino]-ethanesulfonic acid; NaCl: sodium chloride; CaCl<sub>2</sub>: calcium chloride, KCl: potassium chloride

|                         |        |
|-------------------------|--------|
| <b>Glucose</b>          | 5 mM   |
| <b>MES</b>              | 2 mM   |
| <b>NaCl</b>             | 154 mM |
| <b>CaCl<sub>2</sub></b> | 125 mM |
| <b>KCl</b>              | 5 mM   |

**MMG solution**

MgCl<sub>2</sub>: magnesium chloride

|                         |       |
|-------------------------|-------|
| <b>Mannitol</b>         | 0,5 M |
| <b>MES</b>              | 4 mM  |
| <b>MgCl<sub>2</sub></b> | 15 mM |
